# Supplementary material for: Exploring emergency nurses’ attitudes toward family presence during resuscitation: A cross-sectional study in Southwest China
Source: Research Square preprint supplement (doi:10.21203/rs.3.rs-8039224/v1), 2026-01-30
Supplement: Supplementary file 1 [file b03d07e614d4b09698fedbd8.docx]

Supplementary Material S1. Comparison of Family Presence Risk-Benefit scores among emergency nurses based on demographic characteristics (n = 315)

| Variable | | Frequency (percentage) | FPR-BS | *t/F* | *p* |
| --- | --- | --- | --- | --- | --- |
| Gender | Women | 268 (85.079) | 2.642 ± 0.685 | -0.842 | 0.400 |
| Men | 47 (14.921) | 2.735 ± 0.774 |
| Age (years) | 18–25 | 33 (10.476) | 2.447 ± 0.563 | 1.951 | 0.102 |
| 26–30 | 90 (28.571) | 2.715 ± 0.670 |
| 31–40 | 152 (48.254) | 2.669 ± 0.702 |
| 41–50 | 36 (11.429) | 2.567 ± 0.772 |
| > 50 | 4 (1.270) | 3.309 ± 1.174 |
| Educational level | Junior college | 57 (18.095) | 2.589 ± 0.775 | 0.617 | 0.540 |
| Undergraduate course | 254 (80.635) | 2.666 ± 0.679 |
| Master’s degree or above | 4 (1.270) | 2.941 ± 0.882 |
| Marital status | Married | 219 (69.524) | 2.675 ± 0.692 | 0.305 | 0.737 |
| Unmarried | 82 (26.032) | 2.605 ± 0.662 |
| Divorced or otherwise | 14 (4.444) | 2.643 ± 1.000 |
| Presence of children | No | 110 (34.921) | 2.644 ± 0.646 | -0.206 | 0.837 |
| Yes | 205 (65.079) | 2.661 ± 0.727 |
| Job title | Nurse | 31 (9.841) | 2.433 ± 0.613 | 1.365 | 0.246 |
| Nurse practitioner | 133 (42.222) | 2.659 ± 0.722 |
| Supervisor nurse | 121 (38.413) | 2.682 ± 0.666 |
| Deputy chief nurse | 20 (6.349) | 2.656 ± 0.745 |
| Chief nurse | 10 (3.175) | 2.976 ± 0.869 |
| Position | Head nurse or department nurse | 46 (14.603) | 2.751 ± 0.683 | 1.781 | 0.165 |
| None | 253 (80.317) | 2.666 ± 0.680 |
| Other | 16 (5.079) | 2.710 ± 0.898 |
| Years of nursing work (including standardized training time) | ≤ 5 | 77 (24.444) | 2.614 ± 0.664 | 2.296 | 0.059* |
| 6–10 | 73 (23.175) | 2.750 ± 0.740 |
| 11–15 | 94 (29.841) | 2.700 ± 0.632 |
| 16–20 | 34 (10.794) | 2.346 ± 0.676 |
| > 20 | 37 (11.746) | 2.727 ± 0.813 |
| Years of working in emergency nursing | ≤ 5 | 122 (38.730) | 2.313 ± 0.587 | 18.755 | 0.000*** |
| 6–10 | 42 (13.333) | 2.699 ± 0.784 |
| 11–15 | 68 (21.587) | 2.733 ± 0.611 |
| 16–20 | 42 (13.333) | 2.986 ± 0.550 |
| > 20 | 41 (13.016) | 3.162 ± 0.691 |
| Personal monthly income (Renminbi) | ≤ 5,000 | 50 (15.873) | 2.431 ± 0.693 | 0.546 | 0.651 |
| 5,001–10,000 | 205 (65.079) | 2.410 ± 0.583 |
| 10,001–15,000 | 53 (16.825) | 2.357 ± 0.508 |
| > 15,000 | 7 (2.222) | 2.654 ± 0.909 |
| Labor relations | Officially on the list | 45 (14.286) | 2.736 ± 0.733 | 0.838 | 0.433 |
| Contract system | 264 (83.810) | 2.636 ± 0.699 |
| Other | 6 (1.905) | 2.922 ± 0.262 |
| Hospital level | Third class B | 31 (9.841) | 2.746 ± 0.418 | 1.602 | 0.174 |
| Third class A | 269 (85.397) | 2.642 ± 0.729 |
| Second class B | 1 (0.317) | 2.824 ± null |
| Second class A | 13 (4.127) | 2.833 ± 0.452 |
| Other | 1 (0.317) | 1.118 ± null |
| Type of hospital | Specialized hospital | 20 (6.349) | 2.553 ± 0.423 | -0.677 | 0.499 |
| General hospital | 295 (93.651) | 2.662 ± 0.714 |
| Nature of hospital management | Public hospital | 307 (97.460) | 2.667 ± 0.698 | 1.789 | 0.075* |
| Private hospital | 8 (2.540) | 2.221 ± 0.636 |
| Nature of hospital teaching | Teaching hospital | 268 (85.079) | 2.640 ± 0.712 | -0.935 | 0.350 |
| Non-teaching hospital | 47 (14.921) | 2.743 ± 0.620 |
| Number of available hospital beds | < 100 | 4 (1.270) | 2.382 ± 0.948 | 0.695 | 0.596 |
| 100–499 | 32 (10.159) | 2.676 ± 0.711 |
| 500–999 | 91 (28.889) | 2.569 ± 0.652 |
| 1,000–1,999 | 122 (38.730) | 2.700 ± 0.740 |
| ≥ 2,000 | 66 (20.952) | 2.700 ± 0.668 |
| Daily admissions to the hospital’s emergency department | < 100 | 37 (11.746) | 2.696 ± 0.667 | 0.292 | 0.831 |
| 100–299 | 161 (51.111) | 2.661 ± 0.752 |
| 300–499 | 59 (18.730) | 2.583 ± 0.565 |
| ≥ 500 | 58 (18.413) | 2.687 ± 0.698 |
| Total number of nursing staff in the hospital’s emergency department | < 10 | 5 (1.587) | 2.424 ± 0.813 | 1.464 | 0.201 |
| 10–19 | 54 (17.143) | 2.712 ± 0.473 |
| 20–49 | 144 (45.714) | 2.649 ± 0.752 |
| 50–99 | 67 (21.270) | 2.523 ± 0.693 |
| 100–199 | 7 (2.222) | 2.571 ± 0.292 |
| ≥ 200 | 38 (12.063) | 2.878 ± 0.775 |
| Holding an emergency specialist nurse certificate | No | 190 (60.317) | 2.366 ± 0.621 | -10.520 | 0.000**** |
| Yes | 125 (39.683) | 3.095 ± 0.571 |
| Experience resuscitating patients | No | 10 (3.175) | 2.576 ± 0.515 | -0.363 | 0.717 |
| Yes | 305 (96.825) | 2.658 ± 0.704 |
| Number of cardiopulmonary resuscitations performed | Never have | 8 (2.540) | 2.662 ± 0.539 | 1.408 | 0.240 |
| 1–4 times | 42 (13.333) | 2.531 ± 0.650 |
| 5–10 times | 36 (11.429) | 2.498 ± 0.657 |
| > 10 times | 229 (72.698) | 2.703 ± 0.716 |
| Family members having experienced cardiopulmonary resuscitations | No | 294 (93.333) | 2.657 ± 0.703 | 0.133 | 0.894 |
| Yes | 21 (6.667) | 2.636 ± 0.644 |
| Number of times family members were invited during resuscitation | Never have | 191 (60.635) | 2.434 ± 0.684 | 20.597 | 0.000**** |
| 1–4 times | 73 (23.175) | 2.975 ± 0.651 |
| 5–10 times | 28 (8.889) | 2.876 ± 0.344 |
| > 10 times | 23 (7.302) | 3.215 ± 0.490 |

* *p* < .1, ** *p* < .05, *** *p* < .01.

Note: FPR-BS: Family Presence Risk-Benefit Scale.

Supplementary Material S2. Family Presence Risk-Benefit scores among emergency nurses

| Item | Mean ± standard deviation |
| --- | --- |
| 1. Family members should be given the option to be present when a loved one is being resuscitated. | 2.108 ± 1.265 |
| 2. Family members will panic when witnessing resuscitation. | 3.444 ± 1.126 |
| 3. Family members will have difficulty adjusting to the long-term emotional impact of watching a resuscitation effort. | 3.270 ± 1.157 |
| 4. The resuscitation team may develop closer relationships with family members who witness the efforts than with those who do not witness the efforts. | 2.543 ± 1.123 |
| 5. I would be more anxious about doing things right if family members were present during a resuscitation effort. | 2.514 ± 1.149 |
| 6. If my loved one were being resuscitated, I would want to be present in the room. | 2.413 ± 1.026 |
| 7. Patients do not want family members present during a resuscitation attempt. | 2.546 ± 1.022 |
| 8. The resuscitation team will try more extensive interventions if family members are present. | 2.384 ± 1.255 |
| 9. Family members who witness unsuccessful resuscitation efforts will have a better grieving process. | 2.194 ± 1.108 |
| 10. If my loved one were being resuscitated, I should be allowed to be present because I am a nurse. | 2.397 ± 1.073 |
| 11. Family members will become disruptive if they witness resuscitation efforts. | 3.095 ± 1.096 |
| 12. Family members who witness a resuscitation effort are more likely to sue. | 2.810 ± 1.017 |
| 13. The resuscitation team will not function as well if family members are present in the room. | 2.654 ± 1.175 |
| 14. Nurses with whom I work are not supportive of family presence during resuscitation efforts. | 3.254 ± 0.964 |
| 15. Family members in the unit where I work prefer to be present in the room during resuscitation efforts. | 2.146 ± 0.929 |
| 16. The presence of family members during resuscitation efforts is beneficial to patients. | 2.063 ± 0.979 |
| 17. The presence of family members during resuscitation efforts is beneficial to families. | 2.095 ± 0.976 |
| 18. The presence of family members during resuscitation efforts is beneficial to nurses. | 1.937 ± 1.141 |
| 19. The presence of family members during resuscitation efforts is beneficial to physicians. | 1.930 ± 1.115 |
| 20. The presence of family members during resuscitation efforts should be a component of family-centered care. | 2.159 ± 1.019 |
| 21. The presence of family members during resuscitation positively affects patient ratings of satisfaction with hospital care. | 2.117 ± 0.991 |
| 22. The presence of family members during resuscitation efforts positively affects family ratings of satisfaction with hospital care. | 2.098 ± 1.009 |
| 23. The presence of family members during resuscitation efforts positively affects nurse ratings of satisfaction in providing optimal patient and family care. | 2.041 ± 0.985 |
| 24. The presence of family members during resuscitation efforts positively affects physician ratings of satisfaction in providing optimal patient and family care. | 2.041 ± 0.981 |
| 25. The presence of family members during resuscitation efforts is a right that all patients should have. | 2.219 ± 0.941 |
| 26. The presence of family members during resuscitation efforts is a right that all family members should have. | 2.184 ± 0.960 |

Supplementary Material S3. Family Presence Self-Confidence scores among emergency nurses

| Item | Mean ± standard deviation |
| --- | --- |
| 1. I could communicate with family members about the resuscitation efforts. | 2.616 ± 1.004 |
| 2. I could administer drug therapies during resuscitation efforts with family members present. | 3.022 ± 0.976 |
| 3. I could perform electrical therapies during resuscitation efforts with family members present. | 2.867 ± 1.013 |
| 4. I could perform chest compressions during resuscitation efforts with family members present. | 3.054 ± 0.981 |
| 5. I could communicate effectively with other health team members during resuscitation efforts with family members present. | 2.879 ± 1.024 |
| 6. I could maintain the patient’s dignity during resuscitation efforts with family members present. | 2.816 ± 0.967 |
| 7. I could select family members who displayed appropriate coping behaviors to be present during resuscitation efforts. | 2.651 ± 0.933 |
| 8. I could prepare family members to enter the area where the patient is being resuscitated. | 2.584 ± 0.942 |
| 9. I could enlist support from attending physicians for family presence during resuscitation efforts. | 2.229 ± 0.960 |
| 10. I could escort family members into the room during the patient’s resuscitation. | 2.273 ± 0.952 |
| 11. I could announce family members’ presence to the resuscitation team during resuscitation efforts. | 2.702 ± 1.009 |
| 12. I could provide psychological support to family members witnessing resuscitation. | 2.549 ± 0.920 |
| 13. I could identify the spiritual and emotional needs of family members witnessing resuscitation. | 2.568 ± 0.902 |
| 14. I could encourage family members to talk to the patient during resuscitation efforts. | 2.492 ± 0.972 |
| 15. I could delegate tasks to other nurses to support family members during resuscitation efforts. | 2.200 ± 1.056 |
| 16. I could debrief family members after resuscitation. | 2.810 ± 0.893 |
| 17. I could coordinate bereavement follow-up with family members after resuscitation efforts, if required. | 2.832 ± 1.016 |
